# Supplementary material
Source: publisher figshare collection journal article supplement (https://acs.figshare.com/ndownloader/files/5066341)
Supplement: Supplementary file 1 [file 5066341]

 
data_estr408

_loop
_publ_author_name
_publ_author_address
'Larry R. Falvello'
; University of Zaragoza
  Department of Inorganic Chemistry
  Plaza San Francisco s/n
  E-50009 Zaragoza
  Spain
;
_publ_contact_author_email         falvello@unizar.es
 
_audit_creation_method            SHELXL-97 
_chemical_name_systematic 
; 
 ? 
; 
_chemical_name_common             ? 
_chemical_melting_point           ? 
_chemical_formula_moiety          ? 
_chemical_formula_sum 
 'C22 H26 Cl F6 N2 O P Ru' 
_chemical_formula_weight          615.94 
 
loop_ 
 _atom_type_symbol 
 _atom_type_description 
 _atom_type_scat_dispersion_real 
 _atom_type_scat_dispersion_imag 
 _atom_type_scat_source 
 'C'  'C'   0.0033   0.0016 
 'International Tables Vol C Tables 4.2.6.8 and 6.1.1.4' 
 'H'  'H'   0.0000   0.0000 
 'International Tables Vol C Tables 4.2.6.8 and 6.1.1.4' 
 'N'  'N'   0.0061   0.0033 
 'International Tables Vol C Tables 4.2.6.8 and 6.1.1.4' 
 'O'  'O'   0.0106   0.0060 
 'International Tables Vol C Tables 4.2.6.8 and 6.1.1.4' 
 'F'  'F'   0.0171   0.0103 
 'International Tables Vol C Tables 4.2.6.8 and 6.1.1.4' 
 'P'  'P'   0.1023   0.0942 
 'International Tables Vol C Tables 4.2.6.8 and 6.1.1.4' 
 'Cl'  'Cl'   0.1484   0.1585 
 'International Tables Vol C Tables 4.2.6.8 and 6.1.1.4' 
 'Ru'  'Ru'  -1.2594   0.8363 
 'International Tables Vol C Tables 4.2.6.8 and 6.1.1.4' 
 
_symmetry_cell_setting            'triclinic'
_symmetry_space_group_name_H-M    'P -1'
 
loop_ 
 _symmetry_equiv_pos_as_xyz 
 'x, y, z' 
 '-x, -y, -z' 
 
_cell_length_a                    8.3919(16) 
_cell_length_b                    11.6702(14) 
_cell_length_c                    13.5049(12) 
_cell_angle_alpha                 80.353(10) 
_cell_angle_beta                  82.684(9) 
_cell_angle_gamma                 72.537(10) 
_cell_volume                      1239.6(3) 
_cell_formula_units_Z             2 
_cell_measurement_temperature     263(1) 
_cell_measurement_reflns_used     25
_cell_measurement_theta_min       12.0
_cell_measurement_theta_max       15.9
 
_exptl_crystal_description        'needle'
_exptl_crystal_colour             'yellow'
_exptl_crystal_size_max           0.39 
_exptl_crystal_size_mid           0.09 
_exptl_crystal_size_min           0.08 
_exptl_crystal_density_meas       ? 
_exptl_crystal_density_diffrn     1.650 
_exptl_crystal_density_method     'not measured' 
_exptl_crystal_F_000              620 
_exptl_absorpt_coefficient_mu     0.868 
_exptl_absorpt_correction_type    'psi-scans'
_exptl_absorpt_correction_T_min   0.842
_exptl_absorpt_correction_T_max   0.879 
_exptl_absorpt_process_details    ? 
 
_exptl_special_details 
; 
 ? 
; 
 
_diffrn_ambient_temperature       263(1) 
_diffrn_radiation_wavelength      0.71073 
_diffrn_radiation_type            MoK\a 
_diffrn_radiation_source          'fine-focus sealed tube' 
_diffrn_radiation_monochromator   graphite 
_diffrn_measurement_device        '\k-geometry diffractometer'
_diffrn_measurement_device_type   'Nonius CAD-4'
_diffrn_measurement_method        'omega-theta scan'
_diffrn_standards_number          3
_diffrn_standards_interval_count  ? 
_diffrn_standards_interval_time   30 
_diffrn_standards_decay_%         ? 
_diffrn_reflns_number             4348 
_diffrn_reflns_av_R_equivalents   0.0232 
_diffrn_reflns_av_sigmaI/netI     0.0623 
_diffrn_reflns_limit_h_min        0 
_diffrn_reflns_limit_h_max        9 
_diffrn_reflns_limit_k_min        -12 
_diffrn_reflns_limit_k_max        13 
_diffrn_reflns_limit_l_min        -15 
_diffrn_reflns_limit_l_max        16 
_diffrn_reflns_theta_min          2.23 
_diffrn_reflns_theta_max          24.98 
_reflns_number_total              4316 
_reflns_number_gt                 3539 
_reflns_threshold_expression      >2sigma(I) 
 
_computing_data_collection        'CAD4/PC V2.0 (Nonius, 1996)'
_computing_cell_refinement        'CAD4/PC V2.0 (Nonius, 1996)'
_computing_data_reduction         'XCAD4 (Harms, 1996)'
_computing_structure_solution     'SHELXS-97 (Sheldrick, 1990)' 
_computing_structure_refinement   'SHELXL-97 (Sheldrick, 1997)' 
_computing_molecular_graphics     'SHELXTL Rel. 5.05/V (Siemens, 1996)'
_computing_publication_material   'SHELX-97 (Sheldrick, 1997)'
 
_refine_special_details 
; 
 Refinement of F^2^ against ALL reflections.  The weighted R-factor wR and 
 goodness of fit S are based on F^2^, conventional R-factors R are based 
 on F, with F set to zero for negative F^2^. The threshold expression of 
 F^2^ > 2sigma(F^2^) is used only for calculating R-factors(gt) etc. and is 
 not relevant to the choice of reflections for refinement.  R-factors based 
 on F^2^ are statistically about twice as large as those based on F, and R- 
 factors based on ALL data will be even larger. 

 The hydrogen atom attached to N(2) was located in a difference Fourier
 map and refined freely.  All other hydrogen atoms, although visible in
 difference Fourier maps, were placed at calculated positions and refined
 as riding atoms.
; 
 
_refine_ls_structure_factor_coef  Fsqd  
_refine_ls_matrix_type            full 
_refine_ls_weighting_scheme       calc  
_refine_ls_weighting_details 
 'calc w=1/[\s^2^(Fo^2^)+(0.0526P)^2^+1.9982P] where P=(Fo^2^+2Fc^2^)/3' 
_atom_sites_solution_primary      direct 
_atom_sites_solution_secondary    difmap 
_atom_sites_solution_hydrogens    geom 
_refine_ls_hydrogen_treatment     mixed 
_refine_ls_extinction_method      none 
_refine_ls_extinction_coef        ? 
_refine_ls_number_reflns          4316 
_refine_ls_number_parameters      350 
_refine_ls_number_restraints      370 
_refine_ls_R_factor_all           0.0657 
_refine_ls_R_factor_gt            0.0496 
_refine_ls_wR_factor_ref          0.1286 
_refine_ls_wR_factor_gt           0.1182 
_refine_ls_goodness_of_fit_ref    1.016 
_refine_ls_restrained_S_all       1.051 
_refine_ls_shift/su_max           0.039 
_refine_ls_shift/su_mean          0.003 
 
loop_ 
 _atom_site_label 
 _atom_site_type_symbol 
 _atom_site_fract_x 
 _atom_site_fract_y 
 _atom_site_fract_z 
 _atom_site_U_iso_or_equiv 
 _atom_site_adp_type 
 _atom_site_occupancy 
 _atom_site_symetry_multiplicity 
 _atom_site_calc_flag 
 _atom_site_refinement_flags 
 _atom_site_disorder_assembly 
 _atom_site_disorder_group 
Ru1 Ru 0.23184(5) 0.03271(4) 0.66896(3) 0.03626(16) Uani 1 1 d . . . 
Cl1 Cl 0.25484(17) -0.06454(13) 0.52223(10) 0.0465(3) Uani 1 1 d . . . 
N1 N 0.1531(6) 0.1942(4) 0.5709(3) 0.0390(10) Uani 1 1 d . . . 
C1 C 0.2561(8) 0.2428(5) 0.5040(4) 0.0493(14) Uani 1 1 d . . . 
H1 H 0.3714 0.2090 0.5055 0.059 Uiso 1 1 calc R . . 
C2 C 0.1958(9) 0.3408(6) 0.4339(5) 0.0608(18) Uani 1 1 d . . . 
H2 H 0.2693 0.3740 0.3891 0.073 Uiso 1 1 calc R . . 
C3 C 0.0250(9) 0.3900(6) 0.4303(5) 0.0577(16) Uani 1 1 d . . . 
H3 H -0.0179 0.4551 0.3818 0.069 Uiso 1 1 calc R . . 
C4 C -0.0816(8) 0.3415(5) 0.4993(4) 0.0490(14) Uani 1 1 d . . . 
H4 H -0.1972 0.3739 0.4983 0.059 Uiso 1 1 calc R . . 
C5 C -0.0146(7) 0.2449(5) 0.5692(4) 0.0415(13) Uani 1 1 d . . . 
C6 C -0.1157(6) 0.1864(5) 0.6496(4) 0.0407(12) Uani 1 1 d . . . 
H6A H -0.1258 0.2207 0.7115 0.049 Uiso 1 1 calc R . . 
H6B H -0.2273 0.2002 0.6291 0.049 Uiso 1 1 calc R . . 
N2 N -0.0301(5) 0.0555(4) 0.6658(3) 0.0357(10) Uani 1 1 d . . . 
H2N H -0.038(6) 0.027(5) 0.613(4) 0.032(14) Uiso 1 1 d . . . 
C7 C -0.1088(6) -0.0154(5) 0.7448(4) 0.0383(12) Uani 1 1 d . . . 
C8 C -0.2021(7) 0.0307(5) 0.8271(4) 0.0438(13) Uani 1 1 d . . . 
H8 H -0.2199 0.1116 0.8340 0.053 Uiso 1 1 calc R . . 
C9 C -0.2702(8) -0.0436(6) 0.9004(4) 0.0512(15) Uani 1 1 d . . . 
H9 H -0.3326 -0.0111 0.9564 0.061 Uiso 1 1 calc R . . 
C10 C -0.2488(8) -0.1629(6) 0.8932(5) 0.0544(16) Uani 1 1 d . . . 
C11 C -0.1522(8) -0.2088(6) 0.8089(5) 0.0560(16) Uani 1 1 d . . . 
H11 H -0.1344 -0.2898 0.8019 0.067 Uiso 1 1 calc R . . 
C12 C -0.0829(8) -0.1363(5) 0.7358(4) 0.0491(14) Uani 1 1 d . . . 
H12 H -0.0185 -0.1686 0.6803 0.059 Uiso 1 1 calc R . . 
C13 C -0.3270(10) -0.2417(7) 0.9721(6) 0.078(2) Uani 1 1 d . . . 
H13A H -0.2425 -0.2949 1.0135 0.094 Uiso 1 1 calc R . . 
H13B H -0.3757 -0.2889 0.9398 0.094 Uiso 1 1 calc R . . 
H13C H -0.4125 -0.1915 1.0132 0.094 Uiso 1 1 calc R . . 
C14 C 0.4509(8) 0.0720(7) 0.7105(5) 0.0631(18) Uani 1 1 d . . . 
H14 H 0.5109 0.1245 0.6775 0.076 Uiso 1 1 calc R . . 
C15 C 0.3133(9) 0.1132(7) 0.7795(6) 0.068(2) Uani 1 1 d . . . 
H15 H 0.2819 0.1934 0.7917 0.082 Uiso 1 1 calc R . . 
C16 C 0.2249(9) 0.0361(9) 0.8288(5) 0.070(2) Uani 1 1 d . . . 
H16 H 0.1335 0.0643 0.8740 0.084 Uiso 1 1 calc R . . 
C17 C 0.2722(10) -0.0865(9) 0.8113(6) 0.079(3) Uani 1 1 d . . . 
H17 H 0.2125 -0.1389 0.8450 0.095 Uiso 1 1 calc R . . 
C18 C 0.4089(10) -0.1280(7) 0.7430(6) 0.071(2) Uani 1 1 d . . . 
H18 H 0.4424 -0.2083 0.7309 0.085 Uiso 1 1 calc R . . 
C19 C 0.4956(8) -0.0447(7) 0.6925(5) 0.0635(19) Uani 1 1 d . . . 
H19 H 0.5854 -0.0709 0.6457 0.076 Uiso 1 1 calc R . . 
P1 P 0.4346(3) 0.4710(2) 0.72521(16) 0.0758(6) Uani 1 1 d DU . . 
F11 F 0.3638(14) 0.4016(8) 0.6663(7) 0.227(4) Uani 1 1 d DU A . 
F1A F 0.365(3) 0.5860(13) 0.6571(16) 0.208(10) Uani 0.50 1 d PDU A 1 
F2A F 0.6059(16) 0.4447(13) 0.6672(13) 0.164(5) Uani 0.50 1 d PDU A 1 
F12 F 0.4990(8) 0.5489(6) 0.7844(5) 0.147(2) Uani 1 1 d DU A . 
F3A F 0.508(3) 0.3555(15) 0.7972(14) 0.213(8) Uani 0.50 1 d PDU A 1 
F4A F 0.277(2) 0.491(3) 0.7942(19) 0.305(12) Uani 0.50 1 d PDU A 1 
F1B F 0.450(2) 0.5556(15) 0.6278(10) 0.141(5) Uani 0.50 1 d PDU A 2 
F2B F 0.6104(16) 0.3973(17) 0.7056(14) 0.217(9) Uani 0.50 1 d PDU A 2 
F3B F 0.412(4) 0.393(2) 0.8218(12) 0.308(13) Uani 0.50 1 d PDU A 2 
F4B F 0.2538(15) 0.555(2) 0.7441(18) 0.262(11) Uani 0.50 1 d PDU A 2 
C20 C 0.0748(12) 0.5744(10) 1.1506(8) 0.120(4) Uani 1 1 d . . . 
H20A H -0.0020 0.6164 1.2005 0.144 Uiso 1 1 calc R . . 
H20B H 0.1679 0.5166 1.1825 0.144 Uiso 1 1 calc R . . 
H20C H 0.0187 0.5328 1.1174 0.144 Uiso 1 1 calc R . . 
C21 C 0.1359(11) 0.6619(7) 1.0762(7) 0.082(2) Uani 1 1 d . . . 
C22 C 0.2669(18) 0.6138(12) 1.0023(10) 0.165(6) Uani 1 1 d . . . 
H22A H 0.2190 0.6150 0.9411 0.198 Uiso 1 1 calc R . . 
H22B H 0.3258 0.5319 1.0271 0.198 Uiso 1 1 calc R . . 
H22C H 0.3435 0.6623 0.9892 0.198 Uiso 1 1 calc R . . 
O1 O 0.0871(11) 0.7685(6) 1.0705(8) 0.155(4) Uani 1 1 d . . . 
 
loop_ 
 _atom_site_aniso_label 
 _atom_site_aniso_U_11 
 _atom_site_aniso_U_22 
 _atom_site_aniso_U_33 
 _atom_site_aniso_U_23 
 _atom_site_aniso_U_13 
 _atom_site_aniso_U_12 
Ru1 0.0282(2) 0.0482(3) 0.0360(2) -0.00881(18) -0.00527(16) -0.01366(18) 
Cl1 0.0390(7) 0.0594(9) 0.0445(8) -0.0189(7) -0.0034(6) -0.0126(6) 
N1 0.039(3) 0.042(3) 0.041(2) -0.009(2) -0.003(2) -0.017(2) 
C1 0.043(3) 0.058(4) 0.054(4) -0.015(3) 0.008(3) -0.025(3) 
C2 0.080(5) 0.051(4) 0.058(4) -0.005(3) 0.007(3) -0.035(4) 
C3 0.076(5) 0.045(4) 0.049(4) -0.001(3) -0.003(3) -0.017(3) 
C4 0.047(3) 0.046(3) 0.053(3) -0.003(3) -0.007(3) -0.013(3) 
C5 0.041(3) 0.042(3) 0.047(3) -0.011(3) -0.005(2) -0.018(2) 
C6 0.031(3) 0.042(3) 0.048(3) -0.003(2) 0.000(2) -0.013(2) 
N2 0.031(2) 0.042(3) 0.035(2) -0.006(2) -0.0003(19) -0.0133(19) 
C7 0.031(3) 0.051(3) 0.038(3) -0.003(2) -0.008(2) -0.018(2) 
C8 0.043(3) 0.053(3) 0.041(3) -0.014(3) -0.003(2) -0.019(3) 
C9 0.048(4) 0.070(4) 0.040(3) -0.008(3) 0.000(3) -0.024(3) 
C10 0.053(4) 0.067(4) 0.047(3) 0.006(3) -0.009(3) -0.029(3) 
C11 0.061(4) 0.046(4) 0.060(4) 0.000(3) -0.005(3) -0.018(3) 
C12 0.051(4) 0.049(3) 0.048(3) -0.007(3) 0.000(3) -0.018(3) 
C13 0.086(6) 0.086(6) 0.068(5) 0.013(4) -0.004(4) -0.046(5) 
C14 0.046(4) 0.095(6) 0.063(4) -0.007(4) -0.021(3) -0.036(4) 
C15 0.061(4) 0.081(5) 0.070(5) -0.030(4) -0.031(4) -0.012(4) 
C16 0.043(4) 0.125(7) 0.039(4) -0.019(4) -0.004(3) -0.013(4) 
C17 0.067(5) 0.117(7) 0.060(4) 0.036(5) -0.036(4) -0.050(5) 
C18 0.073(5) 0.057(4) 0.082(5) 0.002(4) -0.051(4) -0.006(4) 
C19 0.032(3) 0.101(6) 0.054(4) -0.020(4) -0.013(3) -0.005(3) 
P1 0.0739(13) 0.0859(15) 0.0719(13) 0.0001(10) -0.0009(10) -0.0371(11) 
F11 0.366(10) 0.189(7) 0.206(7) -0.019(5) -0.112(7) -0.165(8) 
F1A 0.206(18) 0.097(7) 0.32(2) 0.041(10) -0.186(18) -0.004(10) 
F2A 0.158(7) 0.084(8) 0.197(13) -0.006(7) 0.114(9) -0.014(7) 
F12 0.128(5) 0.164(5) 0.174(5) -0.068(4) -0.035(4) -0.044(4) 
F3A 0.31(2) 0.181(8) 0.161(13) 0.128(10) -0.073(11) -0.147(12) 
F4A 0.143(15) 0.47(4) 0.35(3) -0.18(2) 0.15(2) -0.168(14) 
F1B 0.120(11) 0.170(12) 0.119(6) 0.071(7) -0.033(7) -0.058(9) 
F2B 0.163(6) 0.213(17) 0.184(16) -0.076(12) -0.071(11) 0.130(10) 
F3B 0.45(3) 0.44(3) 0.129(9) 0.134(16) -0.071(18) -0.36(3) 
F4B 0.044(4) 0.49(3) 0.26(2) -0.19(2) 0.041(8) -0.025(8) 
C20 0.088(7) 0.122(8) 0.131(9) 0.033(7) 0.003(6) -0.033(6) 
C21 0.080(6) 0.063(5) 0.112(7) -0.032(5) -0.022(5) -0.018(4) 
C22 0.175(14) 0.138(11) 0.134(11) -0.010(9) 0.046(10) -0.002(10) 
O1 0.149(7) 0.070(5) 0.261(11) -0.049(6) -0.078(7) -0.013(4) 
 
_geom_special_details 
; 
 All esds (except the esd in the dihedral angle between two l.s. planes) 
 are estimated using the full covariance matrix.  The cell esds are taken 
 into account individually in the estimation of esds in distances, angles 
 and torsion angles; correlations between esds in cell parameters are only 
 used when they are defined by crystal symmetry.  An approximate (isotropic) 
 treatment of cell esds is used for estimating esds involving l.s. planes. 
; 
 
loop_ 
 _geom_bond_atom_site_label_1 
 _geom_bond_atom_site_label_2 
 _geom_bond_distance 
 _geom_bond_site_symmetry_2 
 _geom_bond_publ_flag 
Ru1 N1 2.093(5) . ? 
Ru1 N2 2.139(4) . ? 
Ru1 C16 2.159(6) . ? 
Ru1 C15 2.166(6) . ? 
Ru1 C19 2.168(6) . ? 
Ru1 C17 2.175(7) . ? 
Ru1 C14 2.182(6) . ? 
Ru1 C18 2.192(6) . ? 
Ru1 Cl1 2.4036(14) . ? 
N1 C1 1.345(7) . ? 
N1 C5 1.355(7) . ? 
C1 C2 1.368(9) . ? 
C1 H1 0.9300 . ? 
C2 C3 1.379(10) . ? 
C2 H2 0.9300 . ? 
C3 C4 1.380(8) . ? 
C3 H3 0.9300 . ? 
C4 C5 1.370(8) . ? 
C4 H4 0.9300 . ? 
C5 C6 1.493(7) . ? 
C6 N2 1.471(7) . ? 
C6 H6A 0.9700 . ? 
C6 H6B 0.9700 . ? 
N2 C7 1.453(6) . ? 
N2 H2N 0.86(5) . ? 
C7 C8 1.365(7) . ? 
C7 C12 1.385(8) . ? 
C8 C9 1.387(8) . ? 
C8 H8 0.9300 . ? 
C9 C10 1.368(9) . ? 
C9 H9 0.9300 . ? 
C10 C11 1.396(9) . ? 
C10 C13 1.505(8) . ? 
C11 C12 1.378(8) . ? 
C11 H11 0.9300 . ? 
C12 H12 0.9300 . ? 
C13 H13A 0.9600 . ? 
C13 H13B 0.9600 . ? 
C13 H13C 0.9600 . ? 
C14 C19 1.356(10) . ? 
C14 C15 1.405(10) . ? 
C14 H14 0.9300 . ? 
C15 C16 1.370(11) . ? 
C15 H15 0.9300 . ? 
C16 C17 1.417(12) . ? 
C16 H16 0.9300 . ? 
C17 C18 1.396(11) . ? 
C17 H17 0.9300 . ? 
C18 C19 1.420(10) . ? 
C18 H18 0.9300 . ? 
C19 H19 0.9300 . ? 
P1 F1A 1.496(10) . ? 
P1 F2A 1.518(9) . ? 
P1 F3A 1.534(10) . ? 
P1 F4A 1.500(11) . ? 
P1 F11 1.505(6) . ? 
P1 F12 1.551(6) . ? 
P1 F1B 1.524(9) . ? 
P1 F2B 1.484(10) . ? 
P1 F3B 1.489(10) . ? 
P1 F4B 1.554(11) . ? 
C20 C21 1.468(12) . ? 
C20 H20A 0.9600 . ? 
C20 H20B 0.9600 . ? 
C20 H20C 0.9600 . ? 
C21 O1 1.180(9) . ? 
C21 C22 1.434(13) . ? 
C22 H22A 0.9600 . ? 
C22 H22B 0.9600 . ? 
C22 H22C 0.9600 . ? 
 
loop_ 
 _geom_angle_atom_site_label_1 
 _geom_angle_atom_site_label_2 
 _geom_angle_atom_site_label_3 
 _geom_angle 
 _geom_angle_site_symmetry_1 
 _geom_angle_site_symmetry_3 
 _geom_angle_publ_flag 
N1 Ru1 N2 76.86(16) . . ? 
N1 Ru1 C16 120.4(3) . . ? 
N2 Ru1 C16 96.1(2) . . ? 
N1 Ru1 C15 95.5(2) . . ? 
N2 Ru1 C15 119.0(2) . . ? 
C16 Ru1 C15 36.9(3) . . ? 
N1 Ru1 C19 119.8(2) . . ? 
N2 Ru1 C19 162.7(2) . . ? 
C16 Ru1 C19 79.6(3) . . ? 
C15 Ru1 C19 66.8(3) . . ? 
N1 Ru1 C17 158.2(3) . . ? 
N2 Ru1 C17 98.6(2) . . ? 
C16 Ru1 C17 38.2(3) . . ? 
C15 Ru1 C17 67.7(3) . . ? 
C19 Ru1 C17 67.7(3) . . ? 
N1 Ru1 C14 95.4(2) . . ? 
N2 Ru1 C14 155.4(2) . . ? 
C16 Ru1 C14 67.4(3) . . ? 
C15 Ru1 C14 37.7(3) . . ? 
C19 Ru1 C14 36.3(3) . . ? 
C17 Ru1 C14 79.9(3) . . ? 
N1 Ru1 C18 157.3(3) . . ? 
N2 Ru1 C18 124.9(3) . . ? 
C16 Ru1 C18 67.9(3) . . ? 
C15 Ru1 C18 79.8(3) . . ? 
C19 Ru1 C18 38.0(3) . . ? 
C17 Ru1 C18 37.3(3) . . ? 
C14 Ru1 C18 67.3(3) . . ? 
N1 Ru1 Cl1 84.83(12) . . ? 
N2 Ru1 Cl1 83.34(13) . . ? 
C16 Ru1 Cl1 154.1(3) . . ? 
C15 Ru1 Cl1 157.3(2) . . ? 
C19 Ru1 Cl1 93.22(19) . . ? 
C17 Ru1 Cl1 116.1(3) . . ? 
C14 Ru1 Cl1 119.6(2) . . ? 
C18 Ru1 Cl1 91.1(2) . . ? 
C1 N1 C5 118.8(5) . . ? 
C1 N1 Ru1 124.4(4) . . ? 
C5 N1 Ru1 116.5(3) . . ? 
N1 C1 C2 121.8(6) . . ? 
N1 C1 H1 119.1 . . ? 
C2 C1 H1 119.1 . . ? 
C1 C2 C3 119.3(6) . . ? 
C1 C2 H2 120.3 . . ? 
C3 C2 H2 120.3 . . ? 
C2 C3 C4 119.3(6) . . ? 
C2 C3 H3 120.3 . . ? 
C4 C3 H3 120.3 . . ? 
C5 C4 C3 119.0(6) . . ? 
C5 C4 H4 120.5 . . ? 
C3 C4 H4 120.5 . . ? 
N1 C5 C4 121.8(5) . . ? 
N1 C5 C6 113.9(5) . . ? 
C4 C5 C6 124.3(5) . . ? 
N2 C6 C5 108.2(4) . . ? 
N2 C6 H6A 110.1 . . ? 
C5 C6 H6A 110.1 . . ? 
N2 C6 H6B 110.1 . . ? 
C5 C6 H6B 110.1 . . ? 
H6A C6 H6B 108.4 . . ? 
C7 N2 C6 115.6(4) . . ? 
C7 N2 Ru1 117.5(3) . . ? 
C6 N2 Ru1 108.0(3) . . ? 
C7 N2 H2N 103(3) . . ? 
C6 N2 H2N 107(3) . . ? 
Ru1 N2 H2N 105(3) . . ? 
C8 C7 C12 119.4(5) . . ? 
C8 C7 N2 123.3(5) . . ? 
C12 C7 N2 117.3(5) . . ? 
C7 C8 C9 119.8(5) . . ? 
C7 C8 H8 120.1 . . ? 
C9 C8 H8 120.1 . . ? 
C10 C9 C8 122.3(6) . . ? 
C10 C9 H9 118.9 . . ? 
C8 C9 H9 118.9 . . ? 
C9 C10 C11 117.2(6) . . ? 
C9 C10 C13 121.7(6) . . ? 
C11 C10 C13 121.1(6) . . ? 
C12 C11 C10 121.1(6) . . ? 
C12 C11 H11 119.4 . . ? 
C10 C11 H11 119.4 . . ? 
C11 C12 C7 120.2(6) . . ? 
C11 C12 H12 119.9 . . ? 
C7 C12 H12 119.9 . . ? 
C10 C13 H13A 109.5 . . ? 
C10 C13 H13B 109.5 . . ? 
H13A C13 H13B 109.5 . . ? 
C10 C13 H13C 109.5 . . ? 
H13A C13 H13C 109.5 . . ? 
H13B C13 H13C 109.5 . . ? 
C19 C14 C15 119.6(7) . . ? 
C19 C14 Ru1 71.3(4) . . ? 
C15 C14 Ru1 70.5(4) . . ? 
C19 C14 H14 120.2 . . ? 
C15 C14 H14 120.2 . . ? 
Ru1 C14 H14 130.6 . . ? 
C16 C15 C14 120.5(7) . . ? 
C16 C15 Ru1 71.2(4) . . ? 
C14 C15 Ru1 71.7(4) . . ? 
C16 C15 H15 119.8 . . ? 
C14 C15 H15 119.8 . . ? 
Ru1 C15 H15 129.8 . . ? 
C15 C16 C17 120.3(7) . . ? 
C15 C16 Ru1 71.8(4) . . ? 
C17 C16 Ru1 71.5(4) . . ? 
C15 C16 H16 119.9 . . ? 
C17 C16 H16 119.9 . . ? 
Ru1 C16 H16 129.1 . . ? 
C18 C17 C16 119.6(7) . . ? 
C18 C17 Ru1 72.0(4) . . ? 
C16 C17 Ru1 70.3(4) . . ? 
C18 C17 H17 120.2 . . ? 
C16 C17 H17 120.2 . . ? 
Ru1 C17 H17 129.9 . . ? 
C17 C18 C19 118.4(7) . . ? 
C17 C18 Ru1 70.7(4) . . ? 
C19 C18 Ru1 70.1(4) . . ? 
C17 C18 H18 120.8 . . ? 
C19 C18 H18 120.8 . . ? 
Ru1 C18 H18 130.9 . . ? 
C14 C19 C18 121.7(7) . . ? 
C14 C19 Ru1 72.4(4) . . ? 
C18 C19 Ru1 71.9(4) . . ? 
C14 C19 H19 119.1 . . ? 
C18 C19 H19 119.1 . . ? 
Ru1 C19 H19 129.0 . . ? 
F1A P1 F11 90.9(8) . . ? 
F1A P1 F12 86.4(8) . . ? 
F1A P1 F2A 93.4(9) . . ? 
F1A P1 F3A 178.1(12) . . ? 
F1A P1 F4A 92.4(11) . . ? 
F11 P1 F2A 95.4(8) . . ? 
F2A P1 F12 86.4(7) . . ? 
F2A P1 F3A 86.6(9) . . ? 
F4A P1 F2A 172.8(12) . . ? 
F11 P1 F3A 91.0(9) . . ? 
F3A P1 F12 91.7(9) . . ? 
F4A P1 F3A 87.5(11) . . ? 
F4A P1 F11 88.8(10) . . ? 
F4A P1 F12 89.6(10) . . ? 
F11 P1 F12 176.7(5) . . ? 
F11 P1 F1B 87.6(8) . . ? 
F1B P1 F12 90.8(8) . . ? 
F2B P1 F1B 90.3(8) . . ? 
F3B P1 F1B 177.3(13) . . ? 
F1B P1 F4B 87.4(9) . . ? 
F2B P1 F11 93.9(8) . . ? 
F2B P1 F12 88.9(8) . . ? 
F2B P1 F3B 92.3(11) . . ? 
F2B P1 F4B 176.8(12) . . ? 
F3B P1 F11 92.8(10) . . ? 
F3B P1 F12 88.7(10) . . ? 
F3B P1 F4B 89.9(11) . . ? 
F11 P1 F4B 88.2(9) . . ? 
F12 P1 F4B 88.9(9) . . ? 
C21 C20 H20A 109.5 . . ? 
C21 C20 H20B 109.5 . . ? 
H20A C20 H20B 109.5 . . ? 
C21 C20 H20C 109.5 . . ? 
H20A C20 H20C 109.5 . . ? 
H20B C20 H20C 109.5 . . ? 
O1 C21 C22 116.4(11) . . ? 
O1 C21 C20 126.4(11) . . ? 
C22 C21 C20 117.2(9) . . ? 
C21 C22 H22A 109.5 . . ? 
C21 C22 H22B 109.5 . . ? 
H22A C22 H22B 109.5 . . ? 
C21 C22 H22C 109.5 . . ? 
H22A C22 H22C 109.5 . . ? 
H22B C22 H22C 109.5 . . ? 
 
loop_ 
 _geom_hbond_atom_site_label_D 
 _geom_hbond_atom_site_label_H 
 _geom_hbond_atom_site_label_A 
 _geom_hbond_distance_DH 
 _geom_hbond_distance_HA 
 _geom_hbond_distance_DA 
 _geom_hbond_angle_DHA 
 _geom_hbond_site_symmetry_A 
N2 H2N Cl1  0.86(5) 2.60(5) 3.026(5) 112(4) . 
N2 H2N Cl1  0.86(5) 2.63(5) 3.320(5) 139(4) 2_556 
 
_diffrn_measured_fraction_theta_max    0.993 
_diffrn_reflns_theta_full              24.98 
_diffrn_measured_fraction_theta_full   0.993 
_refine_diff_density_max    0.623 
_refine_diff_density_min   -0.891 
_refine_diff_density_rms    0.093 
